# Supplementary material for: Different Features of Tumor-Associated NK Cells in Patients With Low-Grade or High-Grade Peritoneal Carcinomatosis
Source: PubMed Central journal article supplement (PMC6712073; doi:10.3389/fimmu.2019.01963), 2019-08-21
Supplement: Image_1.pdf [file Image_1.pdf]

## Supplemental Figure 1

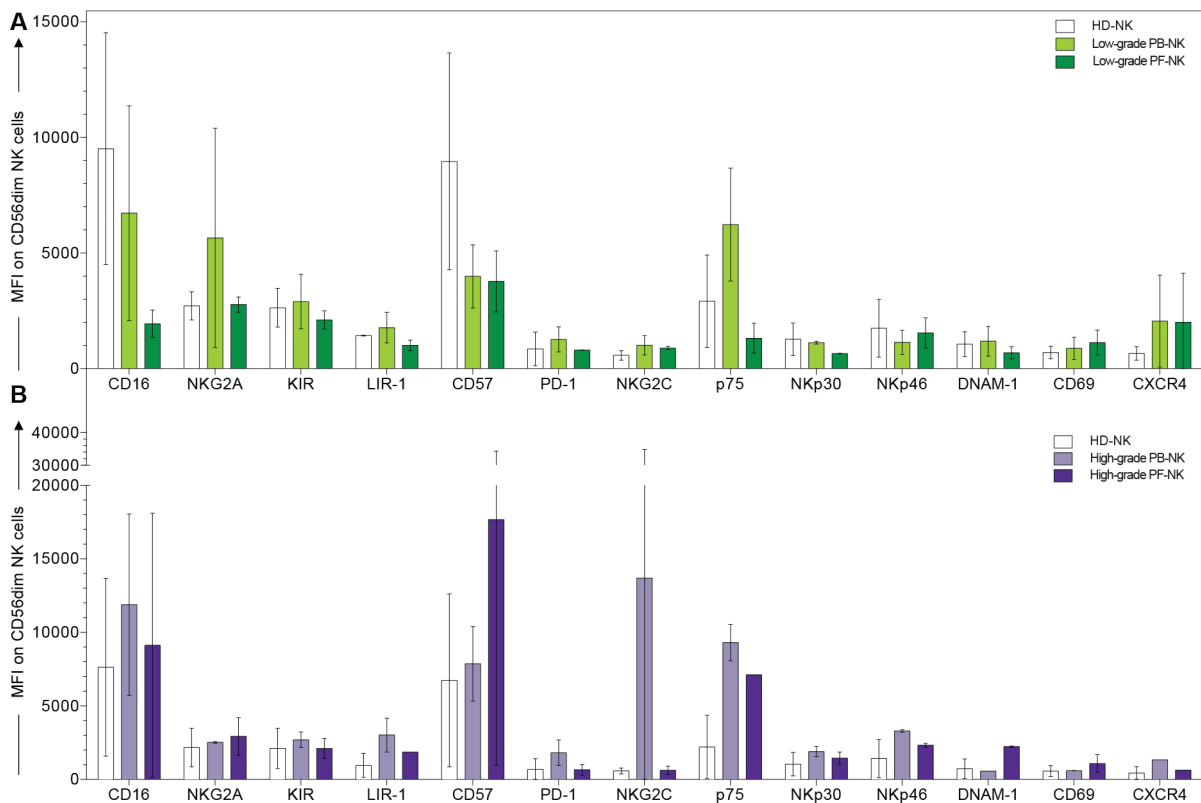

### Comparison of MFI of main NK cell markers on PB- and PF-NK cells derived from low-grade and high-grade PC patients.

Mean Fluorescent Intensity (MFI) of a panel of cell surface markers on HD-NK (□ bars) (n=6), PB-NK of low-grade PC patients (■ bars) (n=5: Pt. 1, Pt. 6, Pt. 7, Pt. 8, Pt. 9) and PF-NK of low-grade PC patients (■ bars) (n=3: Pt. 1, Pt. 6, Pt. 8) (A).

MFI of a panel of cell surface markers on HD-NK (□ bars) (n=6), PB-NK of high-grade PC patients (■ bars) (n=3: Pt. 2, Pt. 3, Pt. 4) and PF-NK of high-grade PC patients (■ bars) (n=3: Pt. 2, Pt. 3, Pt. 4) (B). Cells are gated on CD56dim NK cells (A and B).
