# Supplementary material for: Different Features of Tumor-Associated NK Cells in Patients With Low-Grade or High-Grade Peritoneal Carcinomatosis
Source: PubMed Central journal article supplement (PMC6712073; doi:10.3389/fimmu.2019.01963), 2019-08-21
Supplement: Image_2.pdf [file Image_2.pdf]

## Supplementary Figure 2

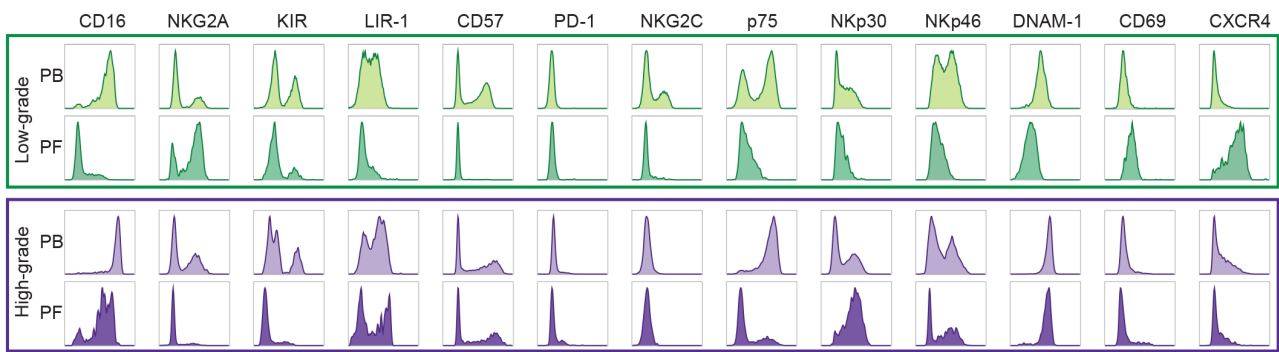

**Histogram plots showing the expression of a panel of cell surface markers on PB- and PF-NK cells derived from low-grade and high-grade PC patients.**

A representative low-grade PC patient (Pt. 6) and a representative high-grade PC patient (Pt. 2) are shown.
